# Supplementary material for: Properties of Markov Chain Monte Carlo Performance across Many Empirical Alignments
Source: PubMed Central journal article supplement (PMC8042746; doi:10.1093/molbev/msaa295), 2020-11-13
Supplement: msaa295_supplementary_data.pdf [file msaa295_supplementary_data.pdf]

Figure S1. Density plot showing time in generations taken for each parameter to reach an ESS value of 200. ESS values were calculated every 1M generations rather than at every sampled interval for computational tractability. Median values are denoted by solid vertical lines. The right tail extends to 10 million but remains flat has been truncated for space.

Parameter (# analyses/parameter)

LnPr (10268)  
kappa (4826)  
topo (20872)  
pinvar (11974)  
alpha (18574)  
pi.T. (19070)  
pi.G. (19070)  
pi.C. (19070)  
pi.A. (19070)  
r.G...T. (15774)  
r.C...T. (15774)  
r.C...G. (15774)  
r.A...T. (15774)  
r.A...G. (15774)  
r.A...C. (15774)  
TL (20912)  
LnL (20912)

4800000

5200000

5600000

6000000

Generations to ESS of 200

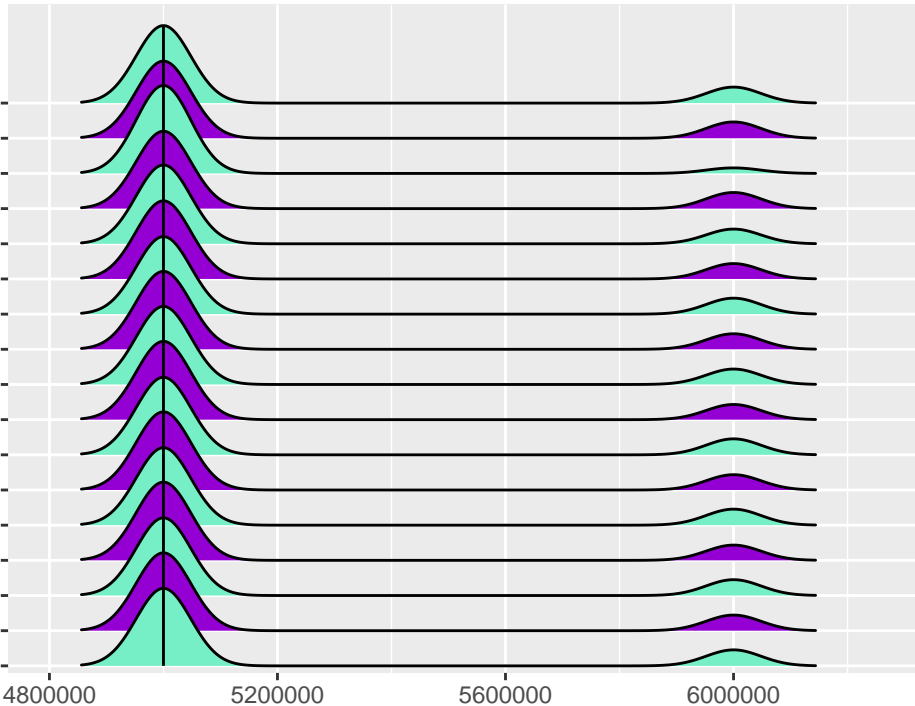

Figure S2. Density plot showing the frequency of autocorrelation times for each parameter. Median values are denoted by solid vertical lines. The right tail extends past 350 but has been truncated for clarity.

Parameter

LnPr  
kappa  
topo  
pinvar  
alpha  
pi.T.  
pi.G.  
pi.C.  
pi.A.  
r.G...T.  
r.C...T.  
r.C...G.  
r.A...T.  
r.A...G.  
r.A...C.  
TL  
LnL

1.0

1.5

2.0

Autocorrelation time

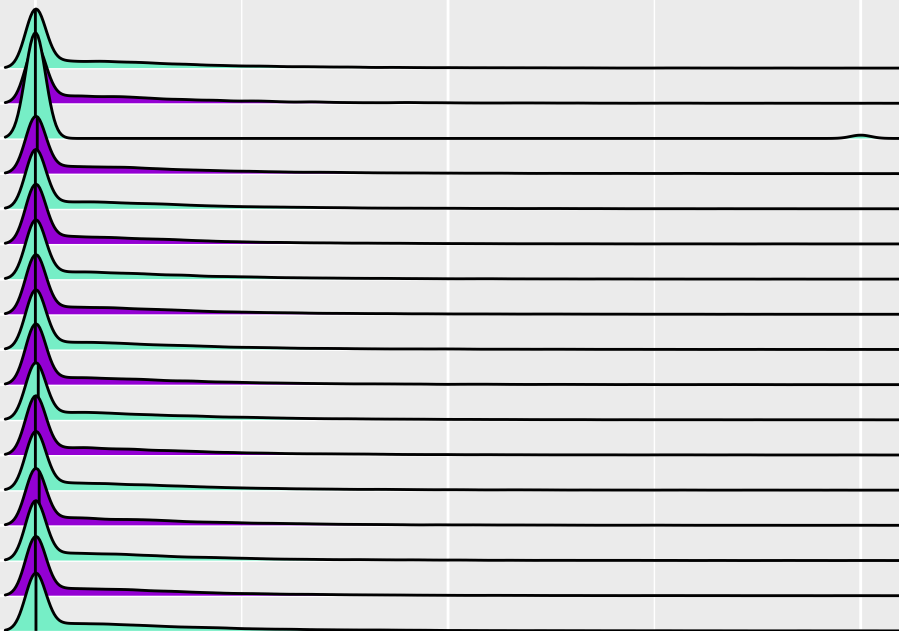

Figure S3. Histograms of the normalized Robin-Foulds (RF) differences among original and reanalyzed sets of chains. A) The top row contains chains originally analyzed using I+ $\Gamma$  and reanalyzed using  $\Gamma$  only. B) The middle row contains chains reanalyzed using the nst=mixed option for reversible-jump model averaging over substitution models. C) The bottom row contains chains reanalyzed using altered heating. The left column shows normalized RF distances between 95% consensus trees. The middle column shows normalized RF distances between 50% consensus trees. The right column shows normalized RF distances between maximum clade credibility trees.

**IG vs G 95% con**  
**Median = 0**

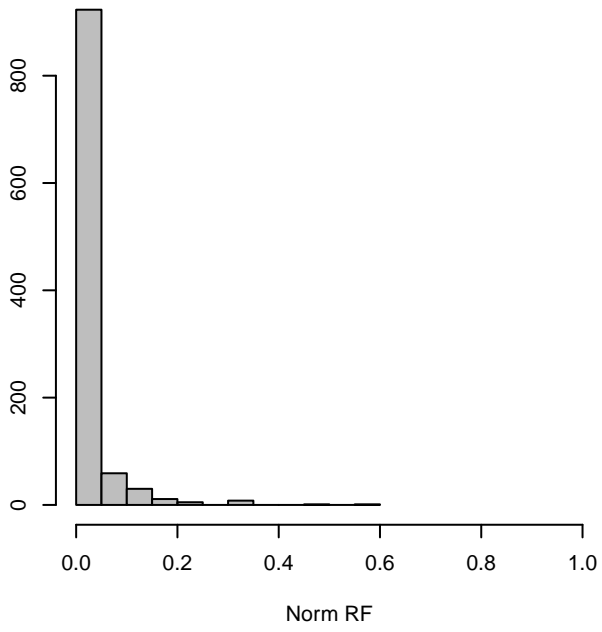

**IG vs G 50% con**  
**Median = 0**

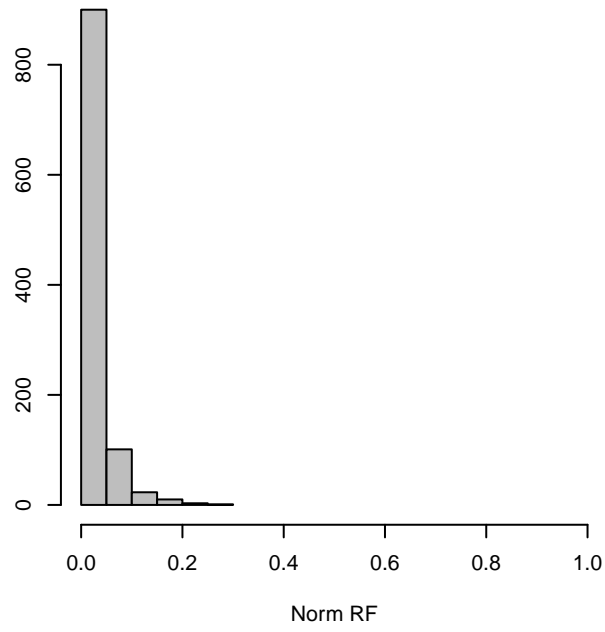

**IG vs G MCC**  
**Median = 0.043**

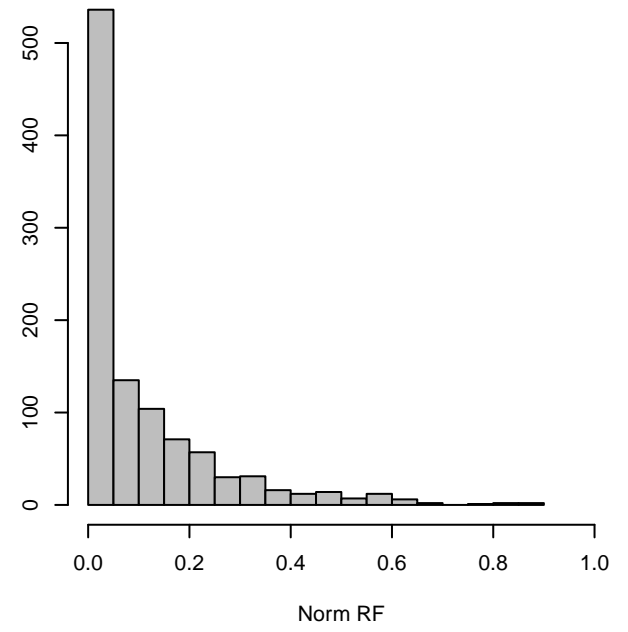

**Nst Mixed 95% con**  
**Median = 0.006**

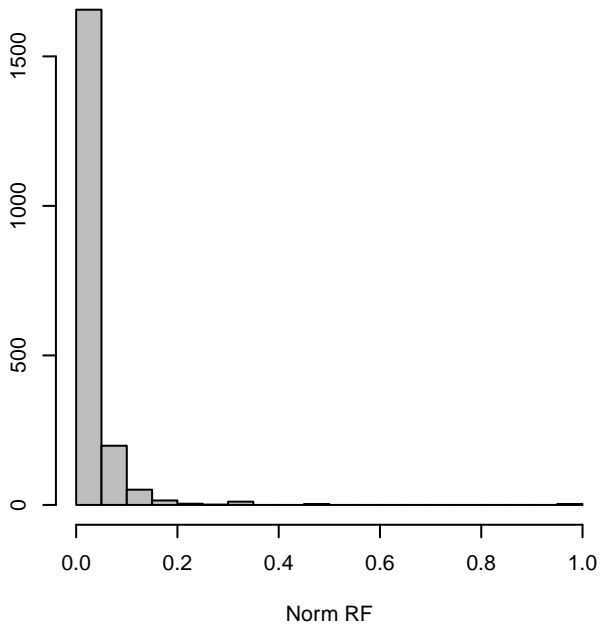

**Nst Mixed 50% con**  
**Median = 0.011**

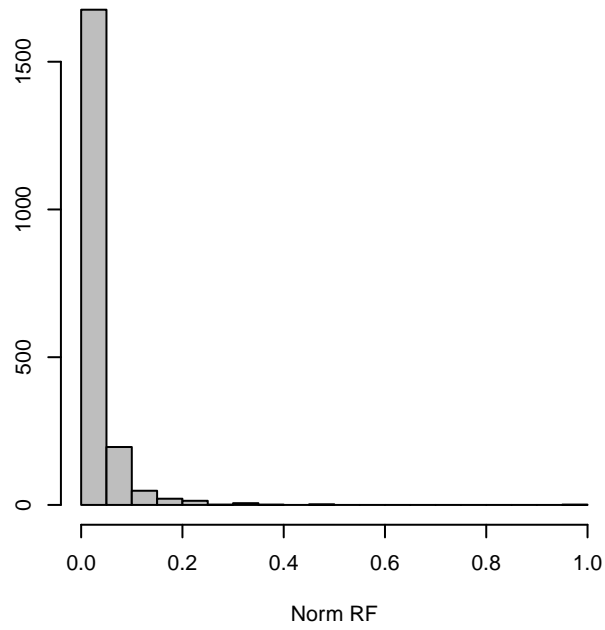

**Nst Mixed MCC**  
**Median = 0.325**

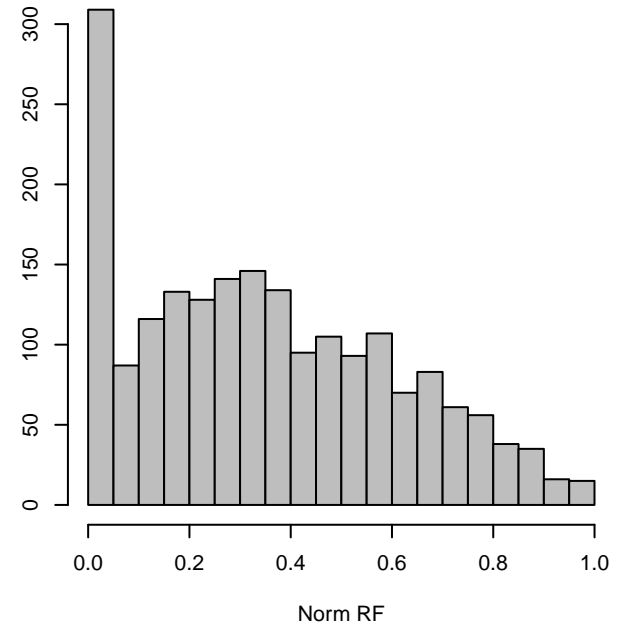

**New Heat 95% con**  
**Median = 0.006**

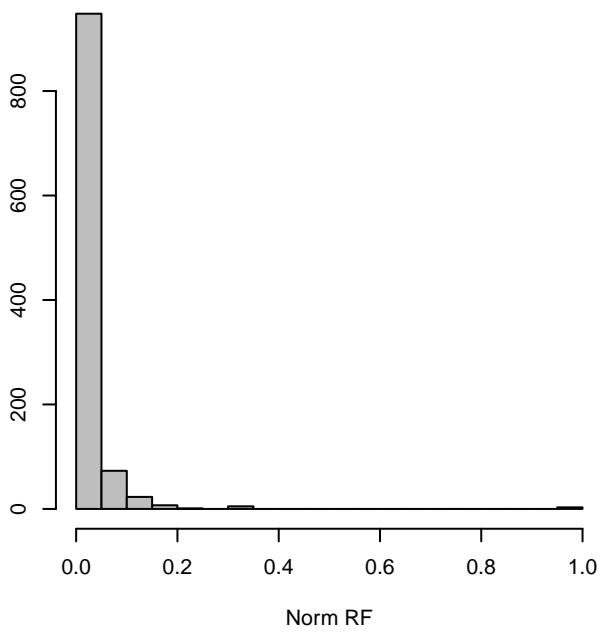

**New Heat 50% con**  
**Median = 0.006**

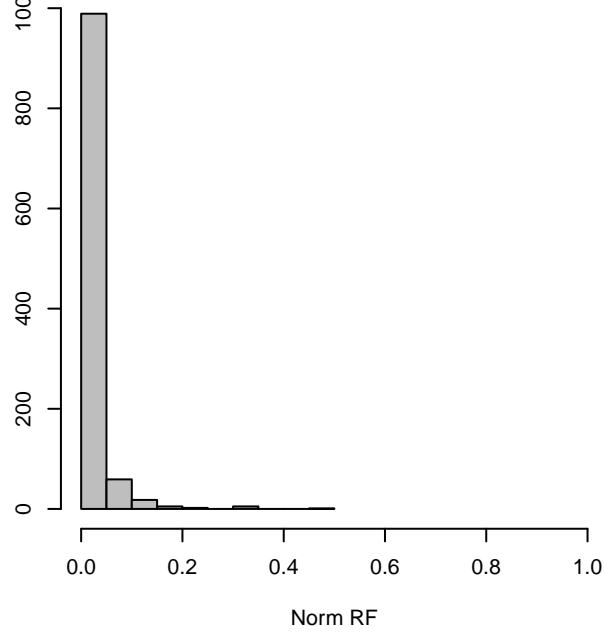

**New Heat MCC**  
**Median = 0.351**

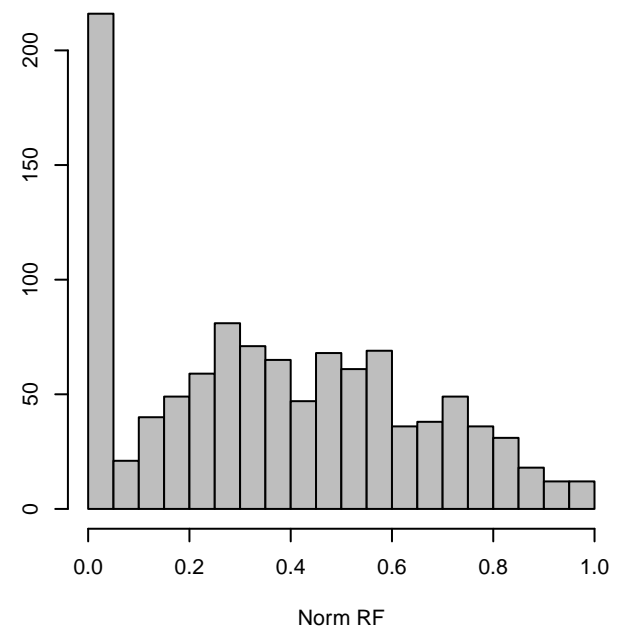

Figure S4. Histograms of the normalized RF distances among original and manually reanalyzed chains. A) The top row contains chains reanalyzed using the HKY model. B) The second row from the top contains the chains reanalyzed using empirical rather than estimated base frequencies. C) The third row from the top contains chains that were run for 30 M rather than 10 M generations while still retaining a total of 1,000 samples. D) The bottom row contains chains that were run for 30 M generations and retaining a total 3,000 samples. The left column shows normalized RF distances between 95% consensus trees. The middle column shows normalized RF distances between 50% consensus trees. The right column shows normalized RF distances between maximum clade credibility trees.

**HKY 95% con**  
**Median = 0.045**

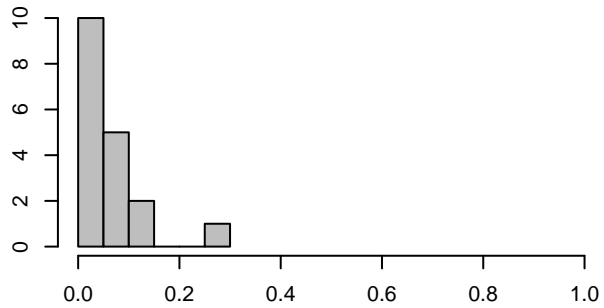

**HKY 50% con**  
**Median = 0.086**

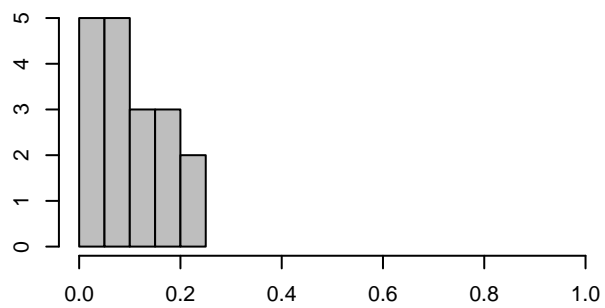

**HKY MCC**  
**Median = 0.346**

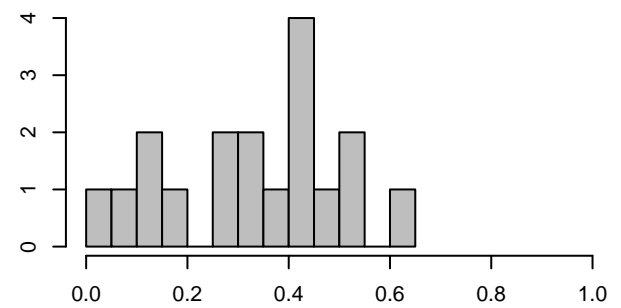

**Empirical Base Freq 95% con**  
**Median = 0.116**

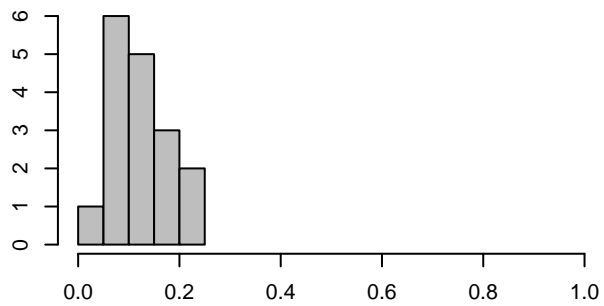

**Empirical Base Freq 50% con**  
**Median = 0.144**

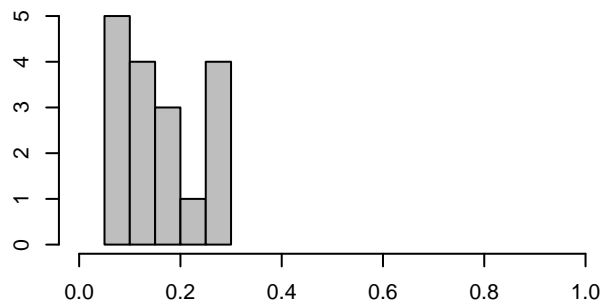

**Empirical Base Freq MCC**  
**Median = 0.377**

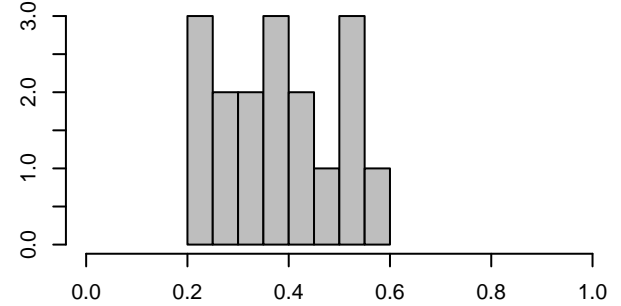

Norm RF

Norm RF

Norm RF

**Run longer 95% con**  
**Median = 0**

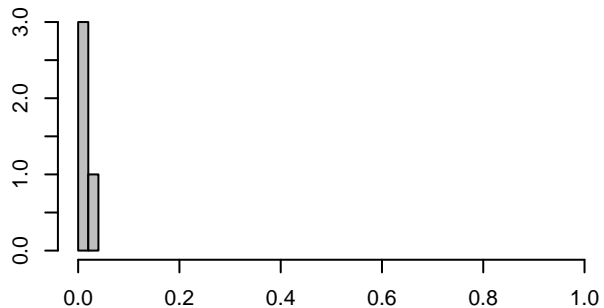

**Run longer 50% con**  
**Median = 0.004**

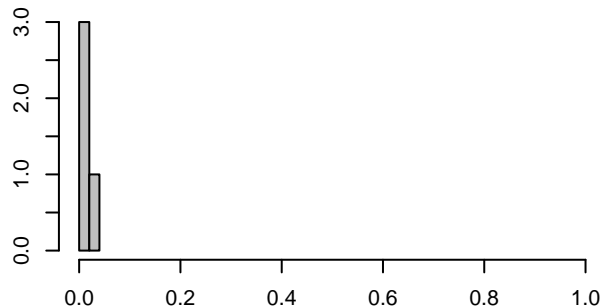

**Run longer MCC**  
**Median = 0.312**

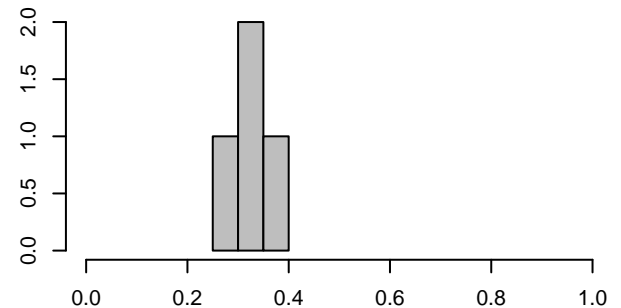

Norm RF

Norm RF

Norm RF

**Nst=Mixed 95% con**  
**Median = 0.027**

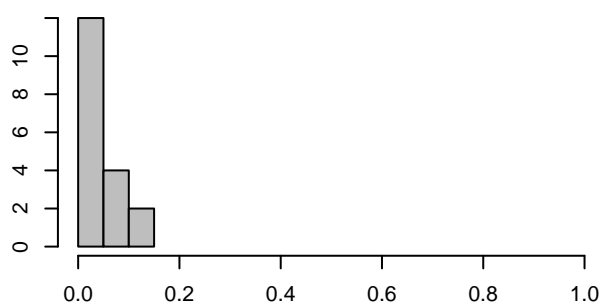

**Nst=Mixed 50% con**  
**Median = 0.02**

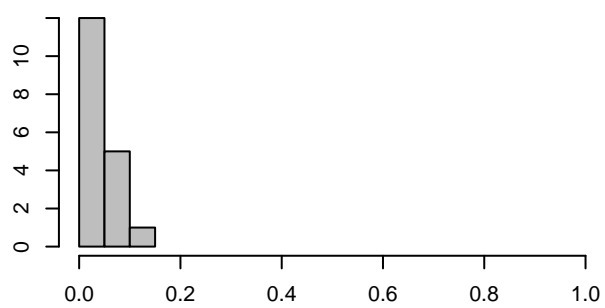

**Nst=Mixed MCC**  
**Median = 0.333**

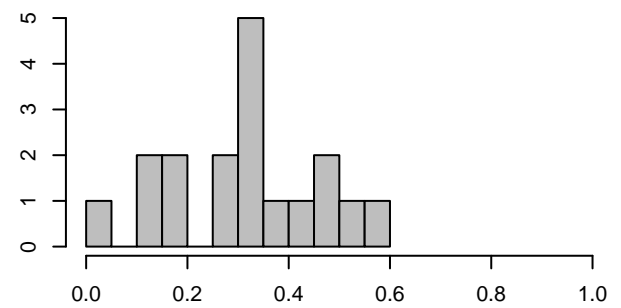

Norm RF

Norm RF

Norm RF



Figure S5. Numbers of characters and taxa included in each of the datasets analyzed in this study.

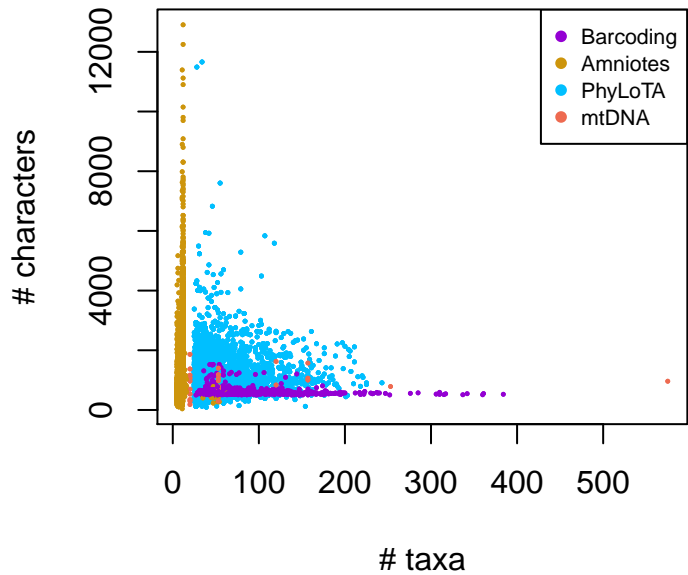

Table S1. MCMC performance diagnostics and dataset features. All diagnostics and acceptance rates are calculated after removing 25% burn-in from chains.

---

| Feature                                                                                   |
|-------------------------------------------------------------------------------------------|
| Parameter autocorrelation times                                                           |
| Parameter effective sample sizes (ESS)                                                    |
| Tree length                                                                               |
| Number of generations to ESS of 200 for each parameter (multiples of 10% of chain length) |
| Topological approximate ESS                                                               |
| Topological autocorrelation time                                                          |
| Number of generations to topological ESS of 200 (multiples of 10% of chain length)        |
| Average standard deviation of split frequencies (ASDSF) – no discard threshold            |
| Correlation in split frequencies                                                          |
| Potential scale reduction factor (PSRF) for non-topology parameters                       |
| Correlations among parameters                                                             |
| Number of taxa                                                                            |
| Number of characters                                                                      |
| Standardized branch length in the tree                                                    |
| MCMC move acceptance rates                                                                |
| Acceptance rates of proposed swaps between cold and first heated chain                    |

---

Table S2. Ratio of parameters that fail ESS per analysis in original analyses and after applying strategies to improve convergence following manual inspection of chains.

| Analysis ID                 | original | run longer | HKY  | Emp BF | Nst=Mixed |
|-----------------------------|----------|------------|------|--------|-----------|
| 0000219ti=50622cl=2db=184   | 0.40     | NA         | 0.00 | 0.00   | 0.37      |
| 0000241ti=4797cl=2db=184    | 0.72     | NA         | 0.00 | 0.00   | 0.04      |
| 0000032ti=162262cl=7db=184  | 0.65     | NA         | 0.00 | 0.00   | 0.00      |
| 0000035ti=92581cl=1db=184   | 0.78     | NA         | 0.00 | 0.00   | 0.29      |
| 0000042ti=70899cl=7db=184   | 0.72     | NA         | 0.00 | 0.00   | 0.76      |
| 0000049ti=186774cl=4db=184  | 0.52     | NA         | 0.00 | 0.00   | 0.35      |
| 0000027ti=6964cl=7db=184    | 0.48     | NA         | 0.00 | NA     | 0.50      |
| 0000066ti=92558cl=12db=184  | 0.42     | 0.13       | 0.00 | 0.00   | 0.50      |
| 0000068ti=239225cl=3db=184  | 0.45     | 0.00       | NA   | NA     | 0.01      |
| 0000080ti=7402cl=0db=184    | 0.55     | NA         | 0.40 | 0.00   | 0.10      |
| 0000085ti=64388cl=1db=184   | 0.52     | NA         | 0.15 | 0.00   | 0.04      |
| 0000090ti=351514cl=4db=184  | 0.78     | NA         | 0.00 | 0.00   | 0.00      |
| 0000105ti=70899cl=10db=184  | 0.68     | NA         | 0.00 | 0.45   | 0.09      |
| 0000110ti=287187cl=35db=184 | 0.48     | NA         | 0.00 | 0.00   | 0.22      |
| 0000112ti=50630cl=2db=184   | 0.62     | 0.00       | 0.18 | 0.00   | 0.71      |
| 0000141ti=360072cl=0db=184  | 0.87     | NA         | 0.45 | 0.00   | 0.35      |
| 0000162ti=71526cl=1db=184   | 0.75     | NA         | 0.00 | 0.00   | 0.18      |
| 0000174ti=243881cl=2db=184  | 0.43     | NA         | 0.28 | 0.07   | 0.19      |
| 0000197ti=9526cl=47db=184   | 0.40     | NA         | 0.30 | 0.18   | 0.19      |
| 0000209ti=27532cl=9db=184   | 0.47     | 0.07       | NA   | NA     | 0.04      |

Table S3. Number of diagnostic thresholds failed per analysis in original analyses and after applying strategies to improve convergence following manual inspection of chains.

| Analysis ID                 | original | run longer | HKY | Emp BF | Nst=Mixed |
|-----------------------------|----------|------------|-----|--------|-----------|
| 0000219ti=50622cl=2db=184   | 16       | NA         | 11  | 7      | 16        |
| 0000241ti=4797cl=2db=184    | 8        | NA         | 4   | 4      | 5         |
| 0000032ti=162262cl=7db=184  | 11       | NA         | 4   | 0      | 4         |
| 0000035ti=92581cl=1db=184   | 12       | NA         | 8   | 4      | 12        |
| 0000042ti=70899cl=7db=184   | 12       | NA         | 0   | 4      | 8         |
| 0000049ti=186774cl=4db=184  | 12       | NA         | 4   | 4      | 12        |
| 0000027ti=6964cl=7db=184    | 12       | NA         | 4   | NA     | 12        |
| 0000066ti=92558cl=12db=184  | 12       | 9          | 8   | 4      | 11        |
| 0000068ti=239225cl=3db=184  | 8        | 0          | NA  | NA     | 5         |
| 0000080ti=7402cl=0db=184    | 8        | NA         | 8   | 4      | 10        |
| 0000085ti=64388cl=1db=184   | 12       | NA         | 6   | 4      | 5         |
| 0000090ti=351514cl=4db=184  | 12       | NA         | 4   | 4      | 4         |
| 0000105ti=70899cl=10db=184  | 15       | NA         | 7   | 10     | 12        |
| 0000110ti=287187cl=35db=184 | 11       | NA         | 4   | 4      | 10        |
| 0000112ti=50630cl=2db=184   | 10       | 0          | 8   | 4      | 9         |
| 0000141ti=360072cl=0db=184  | 12       | NA         | 10  | 4      | 11        |
| 0000162ti=71526cl=1db=184   | 16       | NA         | 4   | 4      | 15        |
| 0000174ti=243881cl=2db=184  | 16       | NA         | 16  | 14     | 15        |
| 0000197ti=9526cl=47db=184   | 20       | NA         | 20  | 19     | 19        |
| 0000209ti=27532cl=9db=184   | 8        | 1          | NA  | NA     | 5         |

Table S4. Whether analyses pass or fail ASDSF in original analyses and after applying strategies to improve convergence following manual inspection of chains.

| Analysis ID                 | original | run longer | HKY    | Emp BF | Nst=Mixed |
|-----------------------------|----------|------------|--------|--------|-----------|
| 0000141ti=360072cl=0db=184  | Failed   | NA         | Failed | Failed | Failed    |
| 0000035ti=92581cl=1db=184   | Failed   | NA         | Failed | Failed | Failed    |
| 0000090ti=351514cl=4db=184  | Failed   | NA         | Failed | Failed | Failed    |
| 0000162ti=71526cl=1db=184   | Failed   | NA         | Failed | Failed | Failed    |
| 0000241ti=4797cl=2db=184    | Failed   | NA         | Failed | Failed | Failed    |
| 0000042ti=70899cl=7db=184   | Failed   | NA         | Pass   | Failed | Failed    |
| 0000105ti=70899cl=10db=184  | Failed   | NA         | Failed | Failed | Failed    |
| 0000032ti=162262cl=7db=184  | Failed   | NA         | Failed | Pass   | Failed    |
| 0000112ti=50630cl=2db=184   | Failed   | Pass       | Failed | Failed | Failed    |
| 0000080ti=7402cl=0db=184    | Failed   | NA         | Failed | Failed | Failed    |
| 0000049ti=186774cl=4db=184  | Failed   | NA         | Failed | Failed | Failed    |
| 0000085ti=64388cl=1db=184   | Failed   | NA         | Failed | Failed | Failed    |
| 0000027ti=6964cl=7db=184    | Failed   | NA         | Failed | NA     | Failed    |
| 0000110ti=287187cl=35db=184 | Failed   | NA         | Failed | Failed | Failed    |
| 0000209ti=27532cl=9db=184   | Failed   | Pass       | NA     | NA     | Failed    |
| 0000068ti=239225cl=3db=184  | Failed   | Pass       | NA     | NA     | Failed    |
| 0000174ti=243881cl=2db=184  | Failed   | NA         | Failed | Failed | Failed    |
| 0000066ti=92558cl=12db=184  | Failed   | Failed     | Failed | Failed | Failed    |
| 0000219ti=50622cl=2db=184   | Failed   | NA         | Failed | Failed | Failed    |
| 0000197ti=9526cl=47db=184   | Failed   | NA         | Failed | Failed | Failed    |
